# Supplementary material for: Computerized cognitive remediation therapy effects on resting state brain activity and cognition in schizophrenia
Source: PubMed Central journal article supplement (PMC5500543; doi:10.1038/s41598-017-04829-9), 2017-07-06
Supplement: 41598_2017_4829_MOESM1_ESM.pdf [file 41598_2017_4829_MOESM1_ESM.pdf]

# **Computerized cognitive remediation therapy effects on resting state brain activity and cognition in schizophrenia**

Fengmei Fan<sup>1,2</sup>, Yizhuang Zou<sup>\*1</sup>, Yunlong Tan<sup>1</sup>, L. Elliot Hong<sup>3</sup>, Shuping Tan<sup>1\*</sup>

1 Beijing Huilongguan Hospital, Peking University, Beijing 100096, P.R. China

2 State Key Laboratory of Cognitive Neuroscience and Learning & International Data Group/McGovern Institute for Brain Research, Center for Collaboration and Innovation in Brain and Learning Sciences, Beijing Normal University, Beijing 100875, China

3 Maryland Psychiatric Research Center, Department of Psychiatry, University of Maryland School of Medicine, Baltimore, USA

Corresponding Author:

Shuping Tan, M.D, PHD; Yizhuang Zou, M.D, PHD

Beijing Huilongguan Hospital, Peking University, Beijing 100096, P.R. China.

Email: shupingt@126.com, yzouy@263.net.

Running title: Cognitive remediation therapy effects on brain activity and cognition in schizophrenia

TableS1. Comparison of PANSS, cognitive function and skill performance at baseline and post-treatment in CCRT and TAU groups

|                           | CCRT (n=12) |       | TAU (n=11) |       | effect of group |             | effect of time |      | group*time interaction |             | Cohen's d |  |
|---------------------------|-------------|-------|------------|-------|-----------------|-------------|----------------|------|------------------------|-------------|-----------|--|
|                           | mean        | std   | mean       | std   | F               | P           | F              | P    | F                      | P           |           |  |
| <b>Symptoms</b>           |             |       |            |       |                 |             |                |      |                        |             |           |  |
| PANSS                     |             |       |            |       |                 |             |                |      |                        |             |           |  |
| Baseline                  | 65.73       | 10.44 | 62.30      | 8.12  | 2.32            | 0.15        | 0.72           | 0.41 | 0.35                   | 0.56        | -0.24     |  |
| Follow-up                 | 62.00       | 10.46 | 60.40      | 5.82  |                 |             |                |      |                        |             |           |  |
| PANSS positive            |             |       |            |       |                 |             |                |      |                        |             |           |  |
| Baseline                  | 13.45       | 4.46  | 10.90      | 3.00  | 7.48            | <b>0.01</b> | 0.38           | 0.55 | 0.36                   | 0.55        | 0.26      |  |
| Follow-up                 | 13.27       | 4.00  | 9.80       | 1.87  |                 |             |                |      |                        |             |           |  |
| PANSS negative            |             |       |            |       |                 |             |                |      |                        |             |           |  |
| Baseline                  | 20.18       | 4.71  | 20.00      | 3.94  | 0.03            | 0.87        | 1.98           | 0.18 | 0.20                   | 0.66        | -0.24     |  |
| Follow-up                 | 18.36       | 4.11  | 18.90      | 2.73  |                 |             |                |      |                        |             |           |  |
| PANSS general psychosis   |             |       |            |       |                 |             |                |      |                        |             |           |  |
| Baseline                  | 28.45       | 3.93  | 27.70      | 3.09  | 0.62            | 0.44        | 1.98           | 0.18 | 1.29                   | 0.27        | -0.42     |  |
| Follow-up                 | 26.73       | 4.54  | 27.60      | 4.22  |                 |             |                |      |                        |             |           |  |
| <b>Cognitive function</b> |             |       |            |       |                 |             |                |      |                        |             |           |  |
| Trail making test         |             |       |            |       |                 |             |                |      |                        |             |           |  |
| Baseline                  | 41.63       | 10.89 | 37.48      | 13.98 | 1.96            | 0.18        | 0.09           | 0.77 | 8.14                   | <b>0.01</b> | 0.97      |  |
| Follow-up                 | 45.82       | 8.10  | 35.80      | 10.85 |                 |             |                |      |                        |             |           |  |
| Spatial span test         |             |       |            |       |                 |             |                |      |                        |             |           |  |
| Baseline                  | 47.78       | 9.72  | 42.11      | 4.55  | 2.46            | 0.13        | 2.30           | 0.15 | 0.22                   | 0.65        | 0.16      |  |
| Follow-up                 | 51.67       | 10.24 | 44.68      | 12.15 |                 |             |                |      |                        |             |           |  |
| Digit sequencing test     |             |       |            |       |                 |             |                |      |                        |             |           |  |
| Baseline                  | 48.73       | 12.90 | 42.70      | 7.74  | 1.99            | 0.18        | 0.02           | 0.89 | 0.002                  | 0.96        | -0.17     |  |
| Follow-up                 | 46.28       | 13.25 | 41.94      | 11.08 |                 |             |                |      |                        |             |           |  |
| Mazes test                |             |       |            |       |                 |             |                |      |                        |             |           |  |
| Baseline                  | 39.71       | 16.30 | 36.19      | 11.13 | 1.29            | 0.27        | 0.63           | 0.44 | 4.11                   | <b>0.06</b> | 0.81      |  |
| Follow-up                 | 50.57       | 14.50 | 39.65      | 9.78  |                 |             |                |      |                        |             |           |  |

Note: PANSS = Positive and Negative Syndrome Scale

### **Effect of treatment across age, age of illness onset, duration of illness**

In this study, we performed correlation analysis to examine relationship between clinical symptoms, cognitive function and brain activity changes with age, age of illness onset, duration of illness. Firstly, we used non-parametric test and found that all the above variables of our data (including clinical symptoms change, cognitive function and brain activity changes, age, age of illness onset, duration of illness) had normal distribution. Then Pearson correlation analysis was performed to explore relationship. The results showed that brain changes in Brainstem had significant negative correlation with onset age ( $r=-0.471$ ,  $P=0.042$ ). We have also added this in the limitation.
